# Supplementary material
Source: PubMed Central journal article supplement (PMC4050145)
Supplement: cc-13-1482-s01.pdf [file cc-13-1482-s01.pdf]

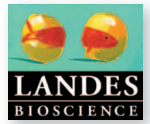

## **Supplemental Material to:**

**Sergey Medvedev, Paula Stein, and Richard M Schultz**

**Specificity of calcium/calmodulin-dependent protein  
kinases in mouse egg activation**

**Cell Cycle 2014; 13(9)**

**<http://dx.doi.org/10.4161/cc.28432>**

**<http://www.landesbioscience.com/journals/cc/article/28432>**

**Figure S1**

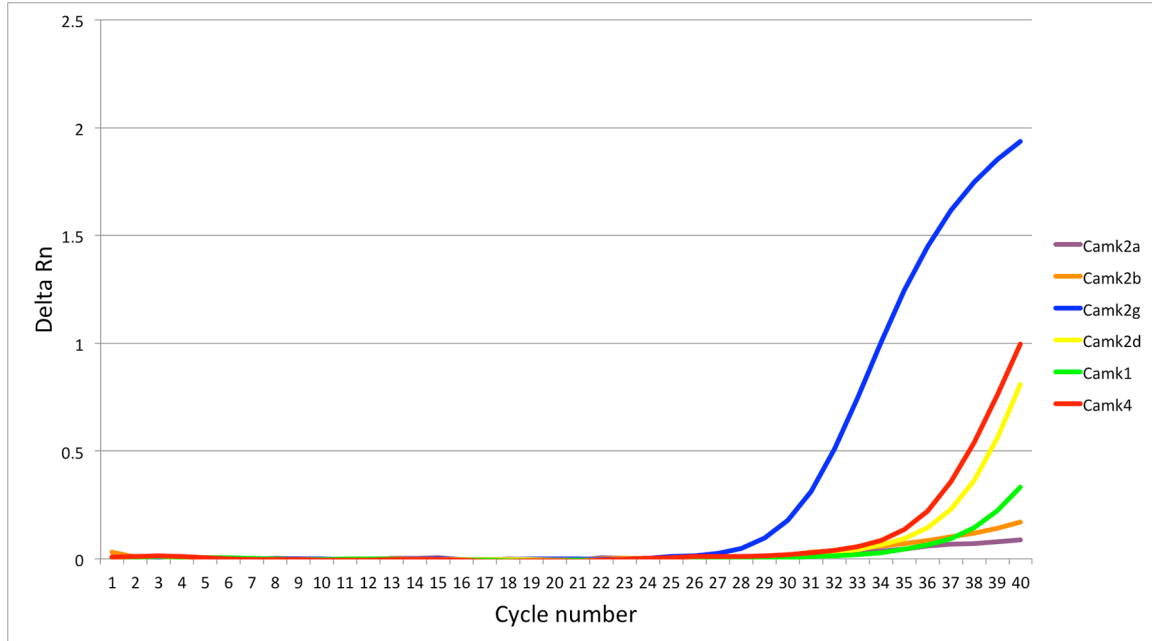

**Low levels of expression of *Camk1* and *Camk4* in mouse oocytes.** Real-time RT-PCR was used to determine the levels of expression of *Camk1* and *Camk4* transcripts, in comparison with the different *Camk2* isoforms in mouse oocytes. RNA isolation, reverse transcription, and real-time PCR were performed as described in Materials and Methods. The experiment was performed three times and a representative example is shown. Delta Rn is the magnitude of the signal generated under our PCR conditions.
